# Supplementary material
Source: publisher figshare collection journal article supplement (https://acs.figshare.com/ndownloader/files/4016287)
Supplement: Supplementary file 1 [file 4016287]

  
data_fk42 
  
_audit_creation_method            SHELXL-97 
_chemical_name_systematic 
; 
 ? 
; 
_chemical_name_common             ? 
_chemical_melting_point           ? 
_chemical_formula_moiety          
 'C41 H39 Ir N5, F6 P, 2(C H2 Cl2)' 
_chemical_formula_sum 
 'C43 H43 Cl4 F6 Ir N5 P' 
_chemical_formula_weight          1108.79 
  
loop_ 
 _atom_type_symbol 
 _atom_type_description 
 _atom_type_scat_dispersion_real 
 _atom_type_scat_dispersion_imag 
 _atom_type_scat_source 
 'C'  'C'   0.0033   0.0016 
 'International Tables Vol C Tables 4.2.6.8 and 6.1.1.4' 
 'H'  'H'   0.0000   0.0000 
 'International Tables Vol C Tables 4.2.6.8 and 6.1.1.4' 
 'N'  'N'   0.0061   0.0033 
 'International Tables Vol C Tables 4.2.6.8 and 6.1.1.4' 
 'F'  'F'   0.0171   0.0103 
 'International Tables Vol C Tables 4.2.6.8 and 6.1.1.4' 
 'P'  'P'   0.1023   0.0942 
 'International Tables Vol C Tables 4.2.6.8 and 6.1.1.4' 
 'Cl'  'Cl'   0.1484   0.1585 
 'International Tables Vol C Tables 4.2.6.8 and 6.1.1.4' 
 'Ir'  'Ir'  -1.4442   7.9887 
 'International Tables Vol C Tables 4.2.6.8 and 6.1.1.4' 
  
_symmetry_cell_setting            Monoclinic 
_symmetry_space_group_name_H-M    'P 21/n'
_symmetry_space_group_name_Hall   '-P 2yn'
  
loop_ 
 _symmetry_equiv_pos_as_xyz 
 'x, y, z' 
 '-x+1/2, y+1/2, -z+1/2' 
 '-x, -y, -z' 
 'x-1/2, -y-1/2, z-1/2' 
  
_cell_length_a                    13.4412(15) 
_cell_length_b                    23.796(6) 
_cell_length_c                    15.1690(18) 
_cell_angle_alpha                 90.00 
_cell_angle_beta                  115.524(8) 
_cell_angle_gamma                 90.00 
_cell_volume                      4378.3(12) 
_cell_formula_units_Z             4 
_cell_measurement_temperature     100(2) 
_cell_measurement_reflns_used     297 
_cell_measurement_theta_min       3 
_cell_measurement_theta_max       22 
  
_exptl_crystal_description        prismatic 
_exptl_crystal_colour             yellow 
_exptl_crystal_size_max           0.45 
_exptl_crystal_size_mid           0.31 
_exptl_crystal_size_min           0.25 
_exptl_crystal_density_meas       ? 
_exptl_crystal_density_diffrn     1.682 
_exptl_crystal_density_method     'not measured' 
_exptl_crystal_F_000              2200 
_exptl_absorpt_coefficient_mu     3.394 
_exptl_absorpt_correction_type    multi-scan 
_exptl_absorpt_correction_T_min   0.3891 
_exptl_absorpt_correction_T_max   0.7459 
_exptl_absorpt_process_details 
'SADABS 2008, Bruker AXS, 2008'
  
_exptl_special_details 
; 
 ? 
; 
  
_diffrn_ambient_temperature       100(2) 
_diffrn_radiation_wavelength      0.71073 
_diffrn_radiation_type            MoK\a 
_diffrn_radiation_source          'fine-focus sealed tube' 
_diffrn_radiation_monochromator   graphite 
_diffrn_measurement_device_type   'Bruker APEX II CCD' 
_diffrn_measurement_method        'phi and omega scans' 
_diffrn_detector_area_resol_mean  ? 
_diffrn_standards_number          ? 
_diffrn_standards_interval_count  ? 
_diffrn_standards_interval_time   ? 
_diffrn_standards_decay_%         ? 
_diffrn_reflns_number             58067 
_diffrn_reflns_av_R_equivalents   0.0604 
_diffrn_reflns_av_sigmaI/netI     0.0441 
_diffrn_reflns_limit_h_min        -18 
_diffrn_reflns_limit_h_max        16 
_diffrn_reflns_limit_k_min        -31 
_diffrn_reflns_limit_k_max        30 
_diffrn_reflns_limit_l_min        -21 
_diffrn_reflns_limit_l_max        19 
_diffrn_reflns_theta_min          3.18 
_diffrn_reflns_theta_max          29.58 
_reflns_number_total              10654 
_reflns_number_gt                 8867 
_reflns_threshold_expression      >2sigma(I) 
  
_computing_data_collection        'Collect (Bruker AXS BV, 1997-2004)' 
_computing_cell_refinement        
'Dirax/lsq (Duisenberg & Schreurs, 1989-2000)' 
_computing_data_reduction         
'EvalCCD (Duisenberg & Schreurs, 1990-2000)' 
_computing_structure_solution     'SHELXS-97 (Sheldrick, 1990)' 
_computing_structure_refinement   'SHELXL-97 (Sheldrick, 1997)' 
_computing_molecular_graphics     'Bruker SHELXTL' 
_computing_publication_material   'Bruker SHELXTL' 
  
_refine_special_details 
; 
 Refinement of F^2^ against ALL reflections.  The weighted R-factor wR and 
 goodness of fit S are based on F^2^, conventional R-factors R are based 
 on F, with F set to zero for negative F^2^. The threshold expression of 
 F^2^ > 2sigma(F^2^) is used only for calculating R-factors(gt) etc. and is 
 not relevant to the choice of reflections for refinement.  R-factors based 
 on F^2^ are statistically about twice as large as those based on F, and R- 
 factors based on ALL data will be even larger. 
; 
  
_refine_ls_structure_factor_coef  Fsqd 
_refine_ls_matrix_type            full 
_refine_ls_weighting_scheme       calc 
_refine_ls_weighting_details 
 'calc w=1/[\s^2^(Fo^2^)+(0.0274P)^2^+13.5159P] where P=(Fo^2^+2Fc^2^)/3' 
_atom_sites_solution_primary      direct 
_atom_sites_solution_secondary    difmap 
_atom_sites_solution_hydrogens    geom 
_refine_ls_hydrogen_treatment     constr 
_refine_ls_extinction_method      SHELXL 
_refine_ls_extinction_coef        0.00025(5) 
_refine_ls_extinction_expression 
 'Fc^*^=kFc[1+0.001xFc^2^\l^3^/sin(2\q)]^-1/4^' 
_refine_ls_number_reflns          10654 
_refine_ls_number_parameters      542 
_refine_ls_number_restraints      0 
_refine_ls_R_factor_all           0.0511 
_refine_ls_R_factor_gt            0.0365 
_refine_ls_wR_factor_ref          0.0857 
_refine_ls_wR_factor_gt           0.0779 
_refine_ls_goodness_of_fit_ref    1.090 
_refine_ls_restrained_S_all       1.090 
_refine_ls_shift/su_max           0.001 
_refine_ls_shift/su_mean          0.000 
  
loop_ 
 _atom_site_label 
 _atom_site_type_symbol 
 _atom_site_fract_x 
 _atom_site_fract_y 
 _atom_site_fract_z 
 _atom_site_U_iso_or_equiv 
 _atom_site_adp_type 
 _atom_site_occupancy 
 _atom_site_symmetry_multiplicity 
 _atom_site_calc_flag 
 _atom_site_refinement_flags 
 _atom_site_disorder_assembly 
 _atom_site_disorder_group 
Ir1 Ir 0.156469(12) 0.365568(6) 0.345112(10) 0.01311(6) Uani 1 1 d . . . 
N1 N 0.2432(3) 0.43648(13) 0.4144(2) 0.0139(6) Uani 1 1 d . . . 
N2 N 0.0856(3) 0.28797(13) 0.2968(2) 0.0166(7) Uani 1 1 d . . . 
N3 N 0.1856(3) 0.37194(13) 0.1465(2) 0.0153(7) Uani 1 1 d . . . 
N4 N 0.0361(3) 0.40928(13) 0.1449(2) 0.0143(6) Uani 1 1 d . . . 
N5 N 0.0054(3) 0.41274(13) 0.2833(2) 0.0170(7) Uani 1 1 d . . . 
C1 C 0.2832(3) 0.47504(16) 0.3721(3) 0.0182(8) Uani 1 1 d . . . 
H1 H 0.2653 0.4716 0.3045 0.022 Uiso 1 1 calc R . . 
C2 C 0.3493(3) 0.51931(17) 0.4242(3) 0.0201(8) Uani 1 1 d . . . 
H2 H 0.3759 0.5458 0.3927 0.024 Uiso 1 1 calc R . . 
C3 C 0.3762(3) 0.52460(17) 0.5232(3) 0.0202(8) Uani 1 1 d . . . 
H3 H 0.4218 0.5545 0.5603 0.024 Uiso 1 1 calc R . . 
C4 C 0.3352(3) 0.48546(17) 0.5667(3) 0.0191(8) Uani 1 1 d . . . 
H4 H 0.3526 0.4886 0.6342 0.023 Uiso 1 1 calc R . . 
C5 C 0.2684(3) 0.44137(16) 0.5118(3) 0.0160(8) Uani 1 1 d . . . 
C6 C 0.2212(3) 0.39717(16) 0.5499(3) 0.0161(8) Uani 1 1 d . . . 
C7 C 0.2366(4) 0.39502(17) 0.6474(3) 0.0198(8) Uani 1 1 d . . . 
H7 H 0.2796 0.4229 0.6925 0.024 Uiso 1 1 calc R . . 
C8 C 0.1889(4) 0.35202(18) 0.6778(3) 0.0235(9) Uani 1 1 d . . . 
H8 H 0.1989 0.3506 0.7437 0.028 Uiso 1 1 calc R . . 
C9 C 0.1267(4) 0.31118(17) 0.6121(3) 0.0215(9) Uani 1 1 d . . . 
H9 H 0.0938 0.2819 0.6329 0.026 Uiso 1 1 calc R . . 
C10 C 0.1122(3) 0.31285(16) 0.5145(3) 0.0189(8) Uani 1 1 d . . . 
H10 H 0.0697 0.2845 0.4703 0.023 Uiso 1 1 calc R . . 
C11 C 0.1592(3) 0.35543(16) 0.4814(3) 0.0171(8) Uani 1 1 d . . . 
C12 C 0.2936(3) 0.31709(16) 0.3994(3) 0.0188(8) Uani 1 1 d . . . 
C13 C 0.4038(4) 0.33344(17) 0.4537(3) 0.0210(9) Uani 1 1 d . . . 
H13 H 0.4213 0.3723 0.4636 0.025 Uiso 1 1 calc R . . 
C14 C 0.4877(4) 0.29389(19) 0.4932(3) 0.0272(10) Uani 1 1 d . . . 
H14 H 0.5617 0.3060 0.5287 0.033 Uiso 1 1 calc R . . 
C15 C 0.4641(4) 0.23660(19) 0.4811(3) 0.0311(11) Uani 1 1 d . . . 
H15 H 0.5219 0.2099 0.5088 0.037 Uiso 1 1 calc R . . 
C16 C 0.3571(4) 0.21868(18) 0.4289(3) 0.0255(9) Uani 1 1 d . . . 
H16 H 0.3410 0.1796 0.4206 0.031 Uiso 1 1 calc R . . 
C17 C 0.2716(4) 0.25833(16) 0.3879(3) 0.0197(8) Uani 1 1 d . . . 
C18 C 0.1562(3) 0.24337(16) 0.3281(3) 0.0186(8) Uani 1 1 d . . . 
C19 C 0.1144(4) 0.18848(17) 0.3006(3) 0.0228(9) Uani 1 1 d . . . 
H19 H 0.1625 0.1571 0.3235 0.027 Uiso 1 1 calc R . . 
C20 C 0.0042(4) 0.18025(18) 0.2407(3) 0.0291(10) Uani 1 1 d . . . 
H20 H -0.0238 0.1434 0.2217 0.035 Uiso 1 1 calc R . . 
C21 C -0.0655(4) 0.22643(19) 0.2082(3) 0.0285(10) Uani 1 1 d . . . 
H21 H -0.1415 0.2216 0.1661 0.034 Uiso 1 1 calc R . . 
C22 C -0.0230(4) 0.27913(17) 0.2379(3) 0.0215(9) Uani 1 1 d . . . 
H22 H -0.0711 0.3106 0.2166 0.026 Uiso 1 1 calc R . . 
C23 C 0.1357(3) 0.38306(15) 0.2048(3) 0.0149(8) Uani 1 1 d . . . 
C24 C 0.1214(3) 0.39025(15) 0.0505(3) 0.0167(8) Uani 1 1 d . . . 
C25 C 0.1420(4) 0.38723(17) -0.0316(3) 0.0209(9) Uani 1 1 d . . . 
H25 H 0.2085 0.3717 -0.0285 0.025 Uiso 1 1 calc R . . 
C26 C 0.0606(4) 0.40811(18) -0.1187(3) 0.0233(9) Uani 1 1 d . . . 
H26 H 0.0717 0.4071 -0.1765 0.028 Uiso 1 1 calc R . . 
C27 C -0.0378(4) 0.43064(17) -0.1221(3) 0.0230(9) Uani 1 1 d . . . 
H27 H -0.0925 0.4438 -0.1828 0.028 Uiso 1 1 calc R . . 
C28 C -0.0574(4) 0.43424(16) -0.0395(3) 0.0190(8) Uani 1 1 d . . . 
H28 H -0.1238 0.4497 -0.0422 0.023 Uiso 1 1 calc R . . 
C29 C 0.0256(3) 0.41393(15) 0.0483(3) 0.0148(8) Uani 1 1 d . . . 
C30 C -0.0326(3) 0.42773(15) 0.1878(3) 0.0145(7) Uani 1 1 d . . . 
C31 C -0.1288(3) 0.45822(17) 0.1392(3) 0.0192(8) Uani 1 1 d . . . 
H31 H -0.1531 0.4678 0.0723 0.023 Uiso 1 1 calc R . . 
C32 C -0.1896(3) 0.47475(18) 0.1897(3) 0.0216(9) Uani 1 1 d . . . 
C33 C -0.1494(4) 0.46031(18) 0.2882(3) 0.0228(9) Uani 1 1 d . . . 
H33 H -0.1882 0.4716 0.3249 0.027 Uiso 1 1 calc R . . 
C34 C -0.0529(3) 0.42953(17) 0.3324(3) 0.0205(9) Uani 1 1 d . . . 
H34 H -0.0268 0.4199 0.3995 0.025 Uiso 1 1 calc R . . 
C35 C 0.2929(3) 0.34419(17) 0.1788(3) 0.0198(8) Uani 1 1 d . . . 
H35A H 0.3349 0.3490 0.2503 0.024 Uiso 1 1 calc R . . 
H35B H 0.3352 0.3625 0.1471 0.024 Uiso 1 1 calc R . . 
C36 C 0.2816(4) 0.28141(18) 0.1543(3) 0.0238(9) Uani 1 1 d . . . 
H36A H 0.2330 0.2636 0.1801 0.029 Uiso 1 1 calc R . . 
H36B H 0.2475 0.2764 0.0825 0.029 Uiso 1 1 calc R . . 
C37 C 0.3944(4) 0.25336(19) 0.1990(3) 0.0267(10) Uani 1 1 d . . . 
H37A H 0.4303 0.2623 0.2696 0.032 Uiso 1 1 calc R . . 
H37B H 0.4401 0.2700 0.1691 0.032 Uiso 1 1 calc R . . 
C38 C 0.3935(4) 0.18893(19) 0.1869(3) 0.0287(10) Uani 1 1 d . . . 
H38A H 0.4697 0.1748 0.2237 0.034 Uiso 1 1 calc R . . 
H38B H 0.3480 0.1723 0.2170 0.034 Uiso 1 1 calc R . . 
C39 C 0.3498(4) 0.16803(19) 0.0816(3) 0.0292(10) Uani 1 1 d . . . 
H39A H 0.3809 0.1916 0.0458 0.035 Uiso 1 1 calc R . . 
H39B H 0.2687 0.1725 0.0494 0.035 Uiso 1 1 calc R . . 
C40 C 0.3786(4) 0.1065(2) 0.0745(4) 0.0377(12) Uani 1 1 d . . . 
H40A H 0.4587 0.1025 0.0999 0.057 Uiso 1 1 calc R . . 
H40B H 0.3435 0.0945 0.0060 0.057 Uiso 1 1 calc R . . 
H40C H 0.3519 0.0831 0.1130 0.057 Uiso 1 1 calc R . . 
C41 C -0.2944(4) 0.5081(2) 0.1393(3) 0.0369(13) Uani 1 1 d . . . 
H41A H -0.2784 0.5482 0.1526 0.055 Uiso 1 1 calc R . . 
H41B H -0.3477 0.4962 0.1639 0.055 Uiso 1 1 calc R . . 
H41C H -0.3254 0.5014 0.0687 0.055 Uiso 1 1 calc R . . 
P1 P 0.39018(9) 0.51082(4) 0.16853(7) 0.0169(2) Uani 1 1 d . . . 
F1 F 0.4148(3) 0.46597(12) 0.10216(19) 0.0412(8) Uani 1 1 d . . . 
F2 F 0.4460(2) 0.46969(10) 0.26076(17) 0.0270(6) Uani 1 1 d . . . 
F3 F 0.2728(2) 0.48270(11) 0.1428(2) 0.0347(7) Uani 1 1 d . . . 
F4 F 0.3658(3) 0.55626(11) 0.23462(19) 0.0337(7) Uani 1 1 d . . . 
F5 F 0.3335(2) 0.55204(10) 0.07556(17) 0.0252(5) Uani 1 1 d . . . 
F6 F 0.5071(2) 0.54048(13) 0.19450(19) 0.0357(7) Uani 1 1 d . . . 
C42 C -0.2770(5) 0.3105(2) 0.3172(4) 0.0411(13) Uani 1 1 d . . . 
H42A H -0.2706 0.3005 0.2566 0.049 Uiso 1 1 calc R . . 
H42B H -0.2036 0.3228 0.3661 0.049 Uiso 1 1 calc R . . 
Cl1 Cl -0.37363(14) 0.36698(6) 0.29258(11) 0.0485(3) Uani 1 1 d . . . 
Cl2 Cl -0.31913(12) 0.25058(6) 0.36190(10) 0.0439(3) Uani 1 1 d . . . 
C43 C 0.0378(4) 0.1255(2) 0.5135(4) 0.0358(12) Uani 1 1 d . . . 
H43A H 0.0348 0.1025 0.5668 0.043 Uiso 1 1 calc R . . 
H43B H 0.0318 0.0997 0.4602 0.043 Uiso 1 1 calc R . . 
Cl3 Cl 0.16619(11) 0.16101(5) 0.55784(9) 0.0356(3) Uani 1 1 d . . . 
Cl4 Cl -0.07509(12) 0.17287(6) 0.46936(10) 0.0425(3) Uani 1 1 d . . . 
  
loop_ 
 _atom_site_aniso_label 
 _atom_site_aniso_U_11 
 _atom_site_aniso_U_22 
 _atom_site_aniso_U_33 
 _atom_site_aniso_U_23 
 _atom_site_aniso_U_13 
 _atom_site_aniso_U_12 
Ir1 0.01393(9) 0.01151(8) 0.01499(8) 0.00140(5) 0.00728(6) 0.00135(6) 
N1 0.0152(17) 0.0152(15) 0.0134(14) 0.0008(12) 0.0080(13) 0.0022(12) 
N2 0.0184(18) 0.0149(16) 0.0205(16) 0.0008(13) 0.0121(14) -0.0010(13) 
N3 0.0173(18) 0.0131(15) 0.0173(15) -0.0002(12) 0.0091(13) 0.0015(12) 
N4 0.0136(17) 0.0149(15) 0.0143(14) -0.0026(12) 0.0060(12) -0.0010(12) 
N5 0.0154(18) 0.0166(16) 0.0192(16) 0.0017(13) 0.0076(13) 0.0012(13) 
C1 0.022(2) 0.0168(19) 0.0186(18) 0.0000(15) 0.0115(16) 0.0008(16) 
C2 0.020(2) 0.021(2) 0.0198(19) 0.0005(16) 0.0087(16) -0.0008(16) 
C3 0.021(2) 0.0179(19) 0.0200(19) -0.0032(15) 0.0068(16) -0.0027(16) 
C4 0.016(2) 0.024(2) 0.0170(18) -0.0001(15) 0.0060(15) 0.0012(16) 
C5 0.014(2) 0.0160(18) 0.0177(18) 0.0019(14) 0.0069(15) 0.0052(15) 
C6 0.017(2) 0.0177(19) 0.0172(18) 0.0035(15) 0.0104(15) 0.0043(15) 
C7 0.025(2) 0.021(2) 0.0157(18) 0.0020(15) 0.0104(16) 0.0046(16) 
C8 0.028(3) 0.026(2) 0.020(2) 0.0057(16) 0.0130(18) 0.0058(18) 
C9 0.022(2) 0.022(2) 0.025(2) 0.0074(16) 0.0146(17) 0.0039(16) 
C10 0.016(2) 0.0166(19) 0.026(2) 0.0025(16) 0.0117(17) 0.0031(15) 
C11 0.017(2) 0.0178(19) 0.0177(18) 0.0045(15) 0.0089(16) 0.0053(15) 
C12 0.021(2) 0.0180(19) 0.0187(18) 0.0011(15) 0.0094(16) 0.0031(16) 
C13 0.020(2) 0.019(2) 0.023(2) 0.0033(16) 0.0092(17) 0.0031(16) 
C14 0.017(2) 0.032(2) 0.030(2) 0.0040(19) 0.0066(18) 0.0041(18) 
C15 0.028(3) 0.026(2) 0.036(3) 0.010(2) 0.012(2) 0.0147(19) 
C16 0.028(3) 0.019(2) 0.031(2) 0.0040(17) 0.0145(19) 0.0063(17) 
C17 0.025(2) 0.0139(18) 0.0198(19) 0.0027(15) 0.0097(17) 0.0044(16) 
C18 0.025(2) 0.0148(18) 0.0201(19) 0.0034(15) 0.0131(17) 0.0024(16) 
C19 0.028(2) 0.0158(19) 0.028(2) -0.0011(16) 0.0155(19) -0.0006(17) 
C20 0.038(3) 0.016(2) 0.034(2) -0.0021(18) 0.016(2) -0.0060(18) 
C21 0.026(3) 0.025(2) 0.030(2) -0.0026(18) 0.0080(19) -0.0087(18) 
C22 0.020(2) 0.018(2) 0.026(2) 0.0040(16) 0.0088(17) -0.0003(16) 
C23 0.017(2) 0.0093(16) 0.0180(18) -0.0014(14) 0.0076(15) -0.0019(14) 
C24 0.022(2) 0.0116(17) 0.0159(18) -0.0010(14) 0.0079(16) 0.0000(15) 
C25 0.024(2) 0.0196(19) 0.025(2) -0.0004(16) 0.0163(18) 0.0027(16) 
C26 0.030(3) 0.024(2) 0.0198(19) -0.0017(16) 0.0139(18) 0.0004(18) 
C27 0.029(3) 0.022(2) 0.0162(19) 0.0016(16) 0.0080(17) -0.0008(17) 
C28 0.021(2) 0.0163(19) 0.0201(19) -0.0010(15) 0.0093(16) -0.0007(15) 
C29 0.014(2) 0.0142(18) 0.0181(18) -0.0022(14) 0.0087(15) -0.0035(14) 
C30 0.014(2) 0.0127(17) 0.0194(18) -0.0035(14) 0.0099(15) -0.0026(14) 
C31 0.016(2) 0.021(2) 0.0179(18) -0.0050(15) 0.0050(15) 0.0015(16) 
C32 0.016(2) 0.025(2) 0.0209(19) -0.0088(16) 0.0048(16) 0.0029(16) 
C33 0.022(2) 0.028(2) 0.023(2) -0.0049(17) 0.0136(17) 0.0015(17) 
C34 0.020(2) 0.026(2) 0.0164(18) 0.0017(16) 0.0089(16) 0.0042(16) 
C35 0.018(2) 0.023(2) 0.0220(19) 0.0019(16) 0.0124(17) 0.0041(16) 
C36 0.028(3) 0.023(2) 0.024(2) 0.0010(17) 0.0140(18) 0.0074(18) 
C37 0.029(3) 0.028(2) 0.024(2) 0.0018(18) 0.0129(19) 0.0069(19) 
C38 0.035(3) 0.026(2) 0.026(2) 0.0018(18) 0.014(2) 0.0083(19) 
C39 0.025(3) 0.029(2) 0.031(2) -0.0038(19) 0.0102(19) 0.0025(19) 
C40 0.036(3) 0.029(3) 0.050(3) -0.013(2) 0.019(2) -0.009(2) 
C41 0.026(3) 0.059(3) 0.018(2) -0.007(2) 0.0034(19) 0.022(2) 
P1 0.0176(5) 0.0173(5) 0.0150(4) 0.0004(4) 0.0063(4) -0.0004(4) 
F1 0.069(2) 0.0329(15) 0.0278(14) -0.0014(12) 0.0264(14) 0.0169(14) 
F2 0.0293(15) 0.0259(13) 0.0195(12) 0.0065(10) 0.0046(10) 0.0014(11) 
F3 0.0223(15) 0.0285(14) 0.0408(16) 0.0118(12) 0.0017(12) -0.0071(11) 
F4 0.063(2) 0.0201(13) 0.0328(14) 0.0011(11) 0.0348(14) 0.0014(13) 
F5 0.0287(15) 0.0243(13) 0.0200(12) 0.0074(10) 0.0080(10) 0.0005(10) 
F6 0.0203(15) 0.0495(18) 0.0336(14) 0.0095(13) 0.0083(11) -0.0076(12) 
C42 0.045(3) 0.047(3) 0.034(3) 0.001(2) 0.019(2) 0.005(3) 
Cl1 0.0556(9) 0.0379(7) 0.0523(8) -0.0057(6) 0.0236(7) -0.0007(6) 
Cl2 0.0450(8) 0.0450(7) 0.0379(7) -0.0026(6) 0.0142(6) 0.0066(6) 
C43 0.042(3) 0.023(2) 0.049(3) -0.004(2) 0.026(3) 0.000(2) 
Cl3 0.0409(7) 0.0296(6) 0.0348(6) -0.0023(5) 0.0150(5) 0.0013(5) 
Cl4 0.0397(8) 0.0389(7) 0.0553(8) 0.0050(6) 0.0266(6) 0.0039(6) 
  
_geom_special_details 
; 
 All esds (except the esd in the dihedral angle between two l.s. planes) 
 are estimated using the full covariance matrix.  The cell esds are taken 
 into account individually in the estimation of esds in distances, angles 
 and torsion angles; correlations between esds in cell parameters are only 
 used when they are defined by crystal symmetry.  An approximate (isotropic) 
 treatment of cell esds is used for estimating esds involving l.s. planes. 
; 
  
loop_ 
 _geom_bond_atom_site_label_1 
 _geom_bond_atom_site_label_2 
 _geom_bond_distance 
 _geom_bond_site_symmetry_2 
 _geom_bond_publ_flag 
Ir1 C12 2.025(4) . ? 
Ir1 N2 2.062(3) . ? 
Ir1 N1 2.063(3) . ? 
Ir1 C11 2.066(4) . ? 
Ir1 C23 2.066(4) . ? 
Ir1 N5 2.150(3) . ? 
N1 C1 1.356(5) . ? 
N1 C5 1.371(5) . ? 
N2 C22 1.360(5) . ? 
N2 C18 1.365(5) . ? 
N3 C23 1.346(5) . ? 
N3 C24 1.405(5) . ? 
N3 C35 1.466(5) . ? 
N4 C23 1.399(5) . ? 
N4 C30 1.409(5) . ? 
N4 C29 1.415(5) . ? 
N5 C34 1.354(5) . ? 
N5 C30 1.360(5) . ? 
C1 C2 1.385(6) . ? 
C1 H1 0.9500 . ? 
C2 C3 1.390(5) . ? 
C2 H2 0.9500 . ? 
C3 C4 1.385(6) . ? 
C3 H3 0.9500 . ? 
C4 C5 1.399(5) . ? 
C4 H4 0.9500 . ? 
C5 C6 1.470(5) . ? 
C6 C7 1.403(5) . ? 
C6 C11 1.420(6) . ? 
C7 C8 1.387(6) . ? 
C7 H7 0.9500 . ? 
C8 C9 1.385(6) . ? 
C8 H8 0.9500 . ? 
C9 C10 1.408(6) . ? 
C9 H9 0.9500 . ? 
C10 C11 1.396(6) . ? 
C10 H10 0.9500 . ? 
C12 C13 1.404(6) . ? 
C12 C17 1.424(5) . ? 
C13 C14 1.391(6) . ? 
C13 H13 0.9500 . ? 
C14 C15 1.394(7) . ? 
C14 H14 0.9500 . ? 
C15 C16 1.377(7) . ? 
C15 H15 0.9500 . ? 
C16 C17 1.408(6) . ? 
C16 H16 0.9500 . ? 
C17 C18 1.463(6) . ? 
C18 C19 1.412(6) . ? 
C19 C20 1.377(6) . ? 
C19 H19 0.9500 . ? 
C20 C21 1.389(6) . ? 
C20 H20 0.9500 . ? 
C21 C22 1.371(6) . ? 
C21 H21 0.9500 . ? 
C22 H22 0.9500 . ? 
C24 C25 1.389(5) . ? 
C24 C29 1.392(6) . ? 
C25 C26 1.395(6) . ? 
C25 H25 0.9500 . ? 
C26 C27 1.407(6) . ? 
C26 H26 0.9500 . ? 
C27 C28 1.391(6) . ? 
C27 H27 0.9500 . ? 
C28 C29 1.404(5) . ? 
C28 H28 0.9500 . ? 
C30 C31 1.386(5) . ? 
C31 C32 1.395(6) . ? 
C31 H31 0.9500 . ? 
C32 C33 1.396(6) . ? 
C32 C41 1.507(6) . ? 
C33 C34 1.385(6) . ? 
C33 H33 0.9500 . ? 
C34 H34 0.9500 . ? 
C35 C36 1.531(6) . ? 
C35 H35A 0.9900 . ? 
C35 H35B 0.9900 . ? 
C36 C37 1.522(6) . ? 
C36 H36A 0.9900 . ? 
C36 H36B 0.9900 . ? 
C37 C38 1.544(6) . ? 
C37 H37A 0.9900 . ? 
C37 H37B 0.9900 . ? 
C38 C39 1.529(6) . ? 
C38 H38A 0.9900 . ? 
C38 H38B 0.9900 . ? 
C39 C40 1.529(6) . ? 
C39 H39A 0.9900 . ? 
C39 H39B 0.9900 . ? 
C40 H40A 0.9800 . ? 
C40 H40B 0.9800 . ? 
C40 H40C 0.9800 . ? 
C41 H41A 0.9800 . ? 
C41 H41B 0.9800 . ? 
C41 H41C 0.9800 . ? 
P1 F1 1.597(3) . ? 
P1 F3 1.600(3) . ? 
P1 F4 1.601(3) . ? 
P1 F2 1.604(2) . ? 
P1 F6 1.609(3) . ? 
P1 F5 1.614(2) . ? 
C42 Cl2 1.772(6) . ? 
C42 Cl1 1.793(6) . ? 
C42 H42A 0.9900 . ? 
C42 H42B 0.9900 . ? 
C43 Cl3 1.773(5) . ? 
C43 Cl4 1.775(5) . ? 
C43 H43A 0.9900 . ? 
C43 H43B 0.9900 . ? 
  
loop_ 
 _geom_angle_atom_site_label_1 
 _geom_angle_atom_site_label_2 
 _geom_angle_atom_site_label_3 
 _geom_angle 
 _geom_angle_site_symmetry_1 
 _geom_angle_site_symmetry_3 
 _geom_angle_publ_flag 
C12 Ir1 N2 80.46(15) . . ? 
C12 Ir1 N1 92.48(14) . . ? 
N2 Ir1 N1 170.63(12) . . ? 
C12 Ir1 C11 84.62(16) . . ? 
N2 Ir1 C11 93.28(14) . . ? 
N1 Ir1 C11 79.83(14) . . ? 
C12 Ir1 C23 103.23(16) . . ? 
N2 Ir1 C23 88.72(13) . . ? 
N1 Ir1 C23 98.95(13) . . ? 
C11 Ir1 C23 172.13(15) . . ? 
C12 Ir1 N5 176.64(14) . . ? 
N2 Ir1 N5 96.19(13) . . ? 
N1 Ir1 N5 90.88(12) . . ? 
C11 Ir1 N5 95.92(14) . . ? 
C23 Ir1 N5 76.28(14) . . ? 
C1 N1 C5 119.2(3) . . ? 
C1 N1 Ir1 124.4(3) . . ? 
C5 N1 Ir1 116.2(3) . . ? 
C22 N2 C18 119.8(3) . . ? 
C22 N2 Ir1 124.9(3) . . ? 
C18 N2 Ir1 115.3(3) . . ? 
C23 N3 C24 111.3(3) . . ? 
C23 N3 C35 124.5(3) . . ? 
C24 N3 C35 124.2(3) . . ? 
C23 N4 C30 118.2(3) . . ? 
C23 N4 C29 110.4(3) . . ? 
C30 N4 C29 131.3(3) . . ? 
C34 N5 C30 118.0(3) . . ? 
C34 N5 Ir1 125.2(3) . . ? 
C30 N5 Ir1 116.8(3) . . ? 
N1 C1 C2 122.1(4) . . ? 
N1 C1 H1 118.9 . . ? 
C2 C1 H1 118.9 . . ? 
C1 C2 C3 119.3(4) . . ? 
C1 C2 H2 120.3 . . ? 
C3 C2 H2 120.3 . . ? 
C4 C3 C2 118.8(4) . . ? 
C4 C3 H3 120.6 . . ? 
C2 C3 H3 120.6 . . ? 
C3 C4 C5 120.4(4) . . ? 
C3 C4 H4 119.8 . . ? 
C5 C4 H4 119.8 . . ? 
N1 C5 C4 120.1(4) . . ? 
N1 C5 C6 114.6(3) . . ? 
C4 C5 C6 125.3(3) . . ? 
C7 C6 C11 121.3(4) . . ? 
C7 C6 C5 123.3(4) . . ? 
C11 C6 C5 115.4(3) . . ? 
C8 C7 C6 119.8(4) . . ? 
C8 C7 H7 120.1 . . ? 
C6 C7 H7 120.1 . . ? 
C9 C8 C7 120.0(4) . . ? 
C9 C8 H8 120.0 . . ? 
C7 C8 H8 120.0 . . ? 
C8 C9 C10 120.3(4) . . ? 
C8 C9 H9 119.9 . . ? 
C10 C9 H9 119.9 . . ? 
C11 C10 C9 121.3(4) . . ? 
C11 C10 H10 119.4 . . ? 
C9 C10 H10 119.4 . . ? 
C10 C11 C6 117.2(4) . . ? 
C10 C11 Ir1 129.0(3) . . ? 
C6 C11 Ir1 113.8(3) . . ? 
C13 C12 C17 117.1(4) . . ? 
C13 C12 Ir1 128.8(3) . . ? 
C17 C12 Ir1 113.9(3) . . ? 
C14 C13 C12 121.3(4) . . ? 
C14 C13 H13 119.3 . . ? 
C12 C13 H13 119.3 . . ? 
C13 C14 C15 120.6(4) . . ? 
C13 C14 H14 119.7 . . ? 
C15 C14 H14 119.7 . . ? 
C16 C15 C14 120.0(4) . . ? 
C16 C15 H15 120.0 . . ? 
C14 C15 H15 120.0 . . ? 
C15 C16 C17 119.9(4) . . ? 
C15 C16 H16 120.1 . . ? 
C17 C16 H16 120.1 . . ? 
C16 C17 C12 121.1(4) . . ? 
C16 C17 C18 123.8(4) . . ? 
C12 C17 C18 115.1(4) . . ? 
N2 C18 C19 119.2(4) . . ? 
N2 C18 C17 114.7(3) . . ? 
C19 C18 C17 126.1(4) . . ? 
C20 C19 C18 120.3(4) . . ? 
C20 C19 H19 119.9 . . ? 
C18 C19 H19 119.9 . . ? 
C19 C20 C21 119.4(4) . . ? 
C19 C20 H20 120.3 . . ? 
C21 C20 H20 120.3 . . ? 
C22 C21 C20 119.0(4) . . ? 
C22 C21 H21 120.5 . . ? 
C20 C21 H21 120.5 . . ? 
N2 C22 C21 122.3(4) . . ? 
N2 C22 H22 118.8 . . ? 
C21 C22 H22 118.8 . . ? 
N3 C23 N4 105.6(3) . . ? 
N3 C23 Ir1 138.8(3) . . ? 
N4 C23 Ir1 115.2(3) . . ? 
C25 C24 C29 122.6(4) . . ? 
C25 C24 N3 130.0(4) . . ? 
C29 C24 N3 107.4(3) . . ? 
C24 C25 C26 116.9(4) . . ? 
C24 C25 H25 121.5 . . ? 
C26 C25 H25 121.5 . . ? 
C25 C26 C27 120.8(4) . . ? 
C25 C26 H26 119.6 . . ? 
C27 C26 H26 119.6 . . ? 
C28 C27 C26 122.1(4) . . ? 
C28 C27 H27 119.0 . . ? 
C26 C27 H27 119.0 . . ? 
C27 C28 C29 116.9(4) . . ? 
C27 C28 H28 121.6 . . ? 
C29 C28 H28 121.6 . . ? 
C24 C29 C28 120.7(4) . . ? 
C24 C29 N4 105.4(3) . . ? 
C28 C29 N4 133.9(4) . . ? 
N5 C30 C31 122.7(4) . . ? 
N5 C30 N4 113.0(3) . . ? 
C31 C30 N4 124.4(3) . . ? 
C30 C31 C32 119.2(4) . . ? 
C30 C31 H31 120.4 . . ? 
C32 C31 H31 120.4 . . ? 
C31 C32 C33 118.1(4) . . ? 
C31 C32 C41 120.8(4) . . ? 
C33 C32 C41 121.2(4) . . ? 
C34 C33 C32 119.9(4) . . ? 
C34 C33 H33 120.1 . . ? 
C32 C33 H33 120.1 . . ? 
N5 C34 C33 122.2(4) . . ? 
N5 C34 H34 118.9 . . ? 
C33 C34 H34 118.9 . . ? 
N3 C35 C36 112.2(3) . . ? 
N3 C35 H35A 109.2 . . ? 
C36 C35 H35A 109.2 . . ? 
N3 C35 H35B 109.2 . . ? 
C36 C35 H35B 109.2 . . ? 
H35A C35 H35B 107.9 . . ? 
C37 C36 C35 110.1(4) . . ? 
C37 C36 H36A 109.6 . . ? 
C35 C36 H36A 109.6 . . ? 
C37 C36 H36B 109.6 . . ? 
C35 C36 H36B 109.6 . . ? 
H36A C36 H36B 108.2 . . ? 
C36 C37 C38 115.3(4) . . ? 
C36 C37 H37A 108.4 . . ? 
C38 C37 H37A 108.4 . . ? 
C36 C37 H37B 108.4 . . ? 
C38 C37 H37B 108.4 . . ? 
H37A C37 H37B 107.5 . . ? 
C39 C38 C37 115.3(4) . . ? 
C39 C38 H38A 108.5 . . ? 
C37 C38 H38A 108.5 . . ? 
C39 C38 H38B 108.5 . . ? 
C37 C38 H38B 108.5 . . ? 
H38A C38 H38B 107.5 . . ? 
C38 C39 C40 113.0(4) . . ? 
C38 C39 H39A 109.0 . . ? 
C40 C39 H39A 109.0 . . ? 
C38 C39 H39B 109.0 . . ? 
C40 C39 H39B 109.0 . . ? 
H39A C39 H39B 107.8 . . ? 
C39 C40 H40A 109.5 . . ? 
C39 C40 H40B 109.5 . . ? 
H40A C40 H40B 109.5 . . ? 
C39 C40 H40C 109.5 . . ? 
H40A C40 H40C 109.5 . . ? 
H40B C40 H40C 109.5 . . ? 
C32 C41 H41A 109.5 . . ? 
C32 C41 H41B 109.5 . . ? 
H41A C41 H41B 109.5 . . ? 
C32 C41 H41C 109.5 . . ? 
H41A C41 H41C 109.5 . . ? 
H41B C41 H41C 109.5 . . ? 
F1 P1 F3 90.98(18) . . ? 
F1 P1 F4 179.48(17) . . ? 
F3 P1 F4 89.36(17) . . ? 
F1 P1 F2 89.77(15) . . ? 
F3 P1 F2 89.95(14) . . ? 
F4 P1 F2 90.63(14) . . ? 
F1 P1 F6 90.10(18) . . ? 
F3 P1 F6 178.69(17) . . ? 
F4 P1 F6 89.55(16) . . ? 
F2 P1 F6 90.79(14) . . ? 
F1 P1 F5 90.20(14) . . ? 
F3 P1 F5 89.77(14) . . ? 
F4 P1 F5 89.41(14) . . ? 
F2 P1 F5 179.72(16) . . ? 
F6 P1 F5 89.49(14) . . ? 
Cl2 C42 Cl1 111.2(3) . . ? 
Cl2 C42 H42A 109.4 . . ? 
Cl1 C42 H42A 109.4 . . ? 
Cl2 C42 H42B 109.4 . . ? 
Cl1 C42 H42B 109.4 . . ? 
H42A C42 H42B 108.0 . . ? 
Cl3 C43 Cl4 112.0(3) . . ? 
Cl3 C43 H43A 109.2 . . ? 
Cl4 C43 H43A 109.2 . . ? 
Cl3 C43 H43B 109.2 . . ? 
Cl4 C43 H43B 109.2 . . ? 
H43A C43 H43B 107.9 . . ? 
  
loop_ 
 _geom_torsion_atom_site_label_1 
 _geom_torsion_atom_site_label_2 
 _geom_torsion_atom_site_label_3 
 _geom_torsion_atom_site_label_4 
 _geom_torsion 
 _geom_torsion_site_symmetry_1 
 _geom_torsion_site_symmetry_2 
 _geom_torsion_site_symmetry_3 
 _geom_torsion_site_symmetry_4 
 _geom_torsion_publ_flag 
C12 Ir1 N1 C1 95.3(3) . . . . ? 
C11 Ir1 N1 C1 179.4(3) . . . . ? 
C23 Ir1 N1 C1 -8.5(3) . . . . ? 
N5 Ir1 N1 C1 -84.7(3) . . . . ? 
C12 Ir1 N1 C5 -79.2(3) . . . . ? 
C11 Ir1 N1 C5 4.9(3) . . . . ? 
C23 Ir1 N1 C5 177.0(3) . . . . ? 
N5 Ir1 N1 C5 100.7(3) . . . . ? 
C12 Ir1 N2 C22 -174.9(3) . . . . ? 
C11 Ir1 N2 C22 101.1(3) . . . . ? 
C23 Ir1 N2 C22 -71.3(3) . . . . ? 
N5 Ir1 N2 C22 4.8(3) . . . . ? 
C12 Ir1 N2 C18 5.0(3) . . . . ?
C11 Ir1 N2 C18 -78.9(3) . . . . ? 
C23 Ir1 N2 C18 108.7(3) . . . . ? 
N5 Ir1 N2 C18 -175.3(3) . . . . ?
N2 Ir1 N5 C34 97.7(3) . . . . ? 
N1 Ir1 N5 C34 -76.1(3) . . . . ? 
C11 Ir1 N5 C34 3.8(3) . . . . ? 
C23 Ir1 N5 C34 -175.1(4) . . . . ?
N2 Ir1 N5 C30 -83.8(3) . . . . ? 
N1 Ir1 N5 C30 102.4(3) . . . . ? 
C11 Ir1 N5 C30 -177.7(3) . . . . ? 
C23 Ir1 N5 C30 3.4(3) . . . . ? 
C5 N1 C1 C2 0.3(6) . . . . ? 
Ir1 N1 C1 C2 -174.1(3) . . . . ? 
N1 C1 C2 C3 0.2(6) . . . . ? 
C1 C2 C3 C4 -0.4(6) . . . . ? 
C2 C3 C4 C5 0.2(6) . . . . ? 
C1 N1 C5 C4 -0.5(5) . . . . ? 
Ir1 N1 C5 C4 174.4(3) . . . . ? 
C1 N1 C5 C6 -179.7(3) . . . . ? 
Ir1 N1 C5 C6 -4.9(4) . . . . ? 
C3 C4 C5 N1 0.2(6) . . . . ? 
C3 C4 C5 C6 179.4(4) . . . . ? 
N1 C5 C6 C7 -179.4(4) . . . . ? 
C4 C5 C6 C7 1.4(6) . . . . ? 
N1 C5 C6 C11 1.5(5) . . . . ? 
C4 C5 C6 C11 -177.7(4) . . . . ? 
C11 C6 C7 C8 -1.2(6) . . . . ? 
C5 C6 C7 C8 179.7(4) . . . . ? 
C6 C7 C8 C9 0.3(6) . . . . ? 
C7 C8 C9 C10 0.4(6) . . . . ? 
C8 C9 C10 C11 -0.3(6) . . . . ? 
C9 C10 C11 C6 -0.6(6) . . . . ? 
C9 C10 C11 Ir1 177.0(3) . . . . ? 
C7 C6 C11 C10 1.3(6) . . . . ? 
C5 C6 C11 C10 -179.6(3) . . . . ? 
C7 C6 C11 Ir1 -176.6(3) . . . . ? 
C5 C6 C11 Ir1 2.5(4) . . . . ? 
C12 Ir1 C11 C10 -88.0(4) . . . . ? 
N2 Ir1 C11 C10 -7.9(4) . . . . ? 
N1 Ir1 C11 C10 178.5(4) . . . . ?
N5 Ir1 C11 C10 88.7(4) . . . . ? 
C12 Ir1 C11 C6 89.6(3) . . . . ? 
N2 Ir1 C11 C6 169.7(3) . . . . ? 
N1 Ir1 C11 C6 -3.9(3) . . . . ? 
N5 Ir1 C11 C6 -93.7(3) . . . . ? 
N2 Ir1 C12 C13 179.8(4) . . . . ? 
N1 Ir1 C12 C13 -6.4(4) . . . . ? 
C11 Ir1 C12 C13 -85.9(4) . . . . ? 
C23 Ir1 C12 C13 93.4(4) . . . . ?
N2 Ir1 C12 C17 -6.9(3) . . . . ? 
N1 Ir1 C12 C17 166.9(3) . . . . ? 
C11 Ir1 C12 C17 87.4(3) . . . . ? 
C23 Ir1 C12 C17 -93.3(3) . . . . ? 
C17 C12 C13 C14 1.0(6) . . . . ? 
Ir1 C12 C13 C14 174.1(3) . . . . ? 
C12 C13 C14 C15 -1.0(7) . . . . ? 
C13 C14 C15 C16 0.6(7) . . . . ? 
C14 C15 C16 C17 -0.1(7) . . . . ? 
C15 C16 C17 C12 0.0(7) . . . . ? 
C15 C16 C17 C18 177.4(4) . . . . ? 
C13 C12 C17 C16 -0.5(6) . . . . ? 
Ir1 C12 C17 C16 -174.6(3) . . . . ? 
C13 C12 C17 C18 -178.0(4) . . . . ? 
Ir1 C12 C17 C18 7.8(5) . . . . ? 
C22 N2 C18 C19 -1.6(6) . . . . ? 
Ir1 N2 C18 C19 178.5(3) . . . . ? 
C22 N2 C18 C17 177.8(4) . . . . ? 
Ir1 N2 C18 C17 -2.2(4) . . . . ? 
C16 C17 C18 N2 178.8(4) . . . . ? 
C12 C17 C18 N2 -3.7(5) . . . . ? 
C16 C17 C18 C19 -1.9(7) . . . . ? 
C12 C17 C18 C19 175.6(4) . . . . ? 
N2 C18 C19 C20 1.8(6) . . . . ? 
C17 C18 C19 C20 -177.5(4) . . . . ? 
C18 C19 C20 C21 -0.5(7) . . . . ? 
C19 C20 C21 C22 -0.9(7) . . . . ? 
C18 N2 C22 C21 0.2(6) . . . . ? 
Ir1 N2 C22 C21 -179.9(3) . . . . ? 
C20 C21 C22 N2 1.1(7) . . . . ? 
C24 N3 C23 N4 0.1(4) . . . . ? 
C35 N3 C23 N4 -179.8(3) . . . . ? 
C24 N3 C23 Ir1 171.9(3) . . . . ? 
C35 N3 C23 Ir1 -8.0(6) . . . . ? 
C30 N4 C23 N3 -177.8(3) . . . . ? 
C29 N4 C23 N3 0.2(4) . . . . ? 
C30 N4 C23 Ir1 8.2(4) . . . . ? 
C29 N4 C23 Ir1 -173.9(2) . . . . ? 
C12 Ir1 C23 N3 -0.6(4) . . . . ? 
N2 Ir1 C23 N3 -80.5(4) . . . . ? 
N1 Ir1 C23 N3 94.1(4) . . . . ?
N5 Ir1 C23 N3 -177.2(4) . . . . ? 
C12 Ir1 C23 N4 170.7(3) . . . . ? 
N2 Ir1 C23 N4 90.8(3) . . . . ? 
N1 Ir1 C23 N4 -94.6(3) . . . . ? 
N5 Ir1 C23 N4 -5.9(2) . . . . ? 
C23 N3 C24 C25 179.7(4) . . . . ? 
C35 N3 C24 C25 -0.4(6) . . . . ? 
C23 N3 C24 C29 -0.3(4) . . . . ? 
C35 N3 C24 C29 179.6(3) . . . . ? 
C29 C24 C25 C26 -1.4(6) . . . . ? 
N3 C24 C25 C26 178.6(4) . . . . ? 
C24 C25 C26 C27 -0.5(6) . . . . ? 
C25 C26 C27 C28 1.4(7) . . . . ? 
C26 C27 C28 C29 -0.4(6) . . . . ? 
C25 C24 C29 C28 2.4(6) . . . . ? 
N3 C24 C29 C28 -177.5(3) . . . . ? 
C25 C24 C29 N4 -179.7(4) . . . . ? 
N3 C24 C29 N4 0.4(4) . . . . ? 
C27 C28 C29 C24 -1.4(6) . . . . ? 
C27 C28 C29 N4 -178.7(4) . . . . ? 
C23 N4 C29 C24 -0.4(4) . . . . ? 
C30 N4 C29 C24 177.2(4) . . . . ? 
C23 N4 C29 C28 177.2(4) . . . . ? 
C30 N4 C29 C28 -5.2(7) . . . . ? 
C34 N5 C30 C31 -1.3(6) . . . . ? 
Ir1 N5 C30 C31 -179.9(3) . . . . ? 
C34 N5 C30 N4 178.4(3) . . . . ? 
Ir1 N5 C30 N4 -0.2(4) . . . . ? 
C23 N4 C30 N5 -5.1(5) . . . . ? 
C29 N4 C30 N5 177.4(3) . . . . ? 
C23 N4 C30 C31 174.6(4) . . . . ? 
C29 N4 C30 C31 -2.9(6) . . . . ? 
N5 C30 C31 C32 0.4(6) . . . . ? 
N4 C30 C31 C32 -179.3(4) . . . . ? 
C30 C31 C32 C33 0.9(6) . . . . ? 
C30 C31 C32 C41 179.9(4) . . . . ? 
C31 C32 C33 C34 -1.2(6) . . . . ? 
C41 C32 C33 C34 179.8(4) . . . . ? 
C30 N5 C34 C33 1.0(6) . . . . ? 
Ir1 N5 C34 C33 179.4(3) . . . . ? 
C32 C33 C34 N5 0.3(7) . . . . ? 
C23 N3 C35 C36 98.4(4) . . . . ? 
C24 N3 C35 C36 -81.4(5) . . . . ? 
N3 C35 C36 C37 -173.8(3) . . . . ? 
C35 C36 C37 C38 175.1(4) . . . . ? 
C36 C37 C38 C39 63.4(6) . . . . ? 
C37 C38 C39 C40 164.7(4) . . . . ? 
  
_diffrn_measured_fraction_theta_max    0.867 
_diffrn_reflns_theta_full              27.50 
_diffrn_measured_fraction_theta_full   0.972 
_refine_diff_density_max    2.119 
_refine_diff_density_min   -1.251 
_refine_diff_density_rms    0.141 
